# Supplementary material
Source: publisher figshare collection journal article supplement (https://diabetesjournals.figshare.com/articles/dataset/_/19184333)

# SUPPLEMENTARY DATA

Supplementary Table 1 - List of mouse TBC1D4 interactors

| Gene name     | Significance based on | Gene name | Significance based on | Gene name | Significance based on |
|---------------|-----------------------|-----------|-----------------------|-----------|-----------------------|
| 1700003F12Rik | t-test                | Eif3e     | Exclusive             | Mybph     | t-test                |
| Acadl         | t-test                | Eif4a2    | t-test                | Myl4      | Exclusive             |
| Acads         | Exclusive             | Eno1      | t-test                | Ndrp2     | Exclusive + t-test    |
| Acadvl        | t-test                | Eno3      | t-test                | Nono      | Exclusive             |
| Aco2          | t-test                | Esd       | Exclusive             | Park7     | t-test                |
| Adsl          | Exclusive + t-test    | Etfb      | t-test                | Pebp1     | Exclusive + t-test    |
| Adssl1        | Exclusive + t-test    | Etfdh     | Exclusive             | Pgam2     | t-test                |
| Ak1           | t-test                | Fabp3     | Exclusive + t-test    | Pgk1      | t-test                |
| Akr1b1        | Exclusive + t-test    | Fabp4     | Exclusive             | Pgm1      | t-test                |
| Akr1b10       | Exclusive             | Fh        | Exclusive             | Pkm       | t-test                |
| Alb           | t-test                | Fkbp1a    | Exclusive             | Ppia      | Exclusive + t-test    |
| Aldoa         | t-test                | G3bp1     | Exclusive             | Prps1l3   | Exclusive             |
| Anxa1         | Exclusive             | Gbas      | Exclusive + t-test    | Psma6     | t-test                |
| Anxa6         | Exclusive             | Gdi2      | Exclusive             | Psmc4     | Exclusive             |
| Apoa1         | Exclusive             | Gm17669   | Exclusive + t-test    | Pvalb     | t-test                |
| Atp5d         | t-test                | Gm20390   | Exclusive + t-test    | Rab1b     | Exclusive             |
| Bsg           | Exclusive + t-test    | Gm20425   | Exclusive             | Retnlg    | t-test                |
| Ca3           | t-test                | Got2      | Exclusive + t-test    | Rps24     | Exclusive + t-test    |
| Cand2         | Exclusive + t-test    | Gpd1      | t-test                | Sfpq      | Exclusive             |
| Cfl1          | Exclusive             | Gpd2      | Exclusive             | Sod2      | Exclusive             |
| Cfl2          | Exclusive + t-test    | Gpx4      | Exclusive             | Sucla2    | t-test                |
| Ckm           | t-test                | Gstm2     | Exclusive + t-test    | Sucg1     | t-test                |
| Cox4i1        | t-test                | Gstp1     | Exclusive + t-test    | Taf15     | Exclusive             |
| Cox5a         | Exclusive + t-test    | Hadh      | Exclusive + t-test    | Tbc1d1    | Exclusive             |
| Cox5b         | t-test                | Hba-a1    | t-test                | Tpm3      | Exclusive + t-test    |
| Cox6b1        | t-test                | Hbbt1     | t-test                | Tpt1      | Exclusive             |
| Cox6c         | t-test                | Hmgb1     | Exclusive             | Trim72    | Exclusive + t-test    |
| Cox7a1        | t-test                | Hspb7     | Exclusive + t-test    | Ugp2      | Exclusive             |
| Cs            | t-test                | Hspe1     | Exclusive             | Uqcrb     | Exclusive + t-test    |
| Cycs          | Exclusive + t-test    | Idh2      | Exclusive + t-test    | Uqcrc1    | t-test                |
| D10Jhu81e     | Exclusive + t-test    | Idh3g     | Exclusive             | Vcp       | t-test                |
| Dbi           | Exclusive + t-test    | MacroD1   | Exclusive + t-test    | Vdac1     | t-test                |
| Dusp3         | Exclusive             | Mb        | t-test                | Vdac3     | t-test                |
| Echs1         | Exclusive             | Mdh1      | t-test                | Ywhag     | t-test                |
| Eef1a1        | Exclusive             | Mdh2      | t-test                | Ywhaz     | Exclusive             |
| Eef2          | t-test                | Msn       | Exclusive             |           |                       |
| Eif2s3x       | Exclusive             | Msrb3     | Exclusive             |           |                       |

List of 109 significant TBC1D4 interactors in mouse skeletal muscle. Significance was based on exclusive identification and/or on Students' t-test (>1.5 fold change WT-D4KO and FDR <0.05).

**Supplementary Figure S1 – Intact insulin- and exercise-mediated phosphorylation of TBC1D1 in complex with TBC1D4.** Western blot on protein lysate from basal and insulin-stimulated human skeletal muscle of p-Akt Thr308 (A) and p-Akt Ser473 (B). Western blot on protein lysate from rested and acutely exercised human skeletal muscle of p-AMPK Thr172 (C). \*\*\*\*P<0.0001, \*\*\*P>0.001 and \*\*P>0.01. Bars are means and lines indicate individual responses (n=11 in A-B, n=8 in C).

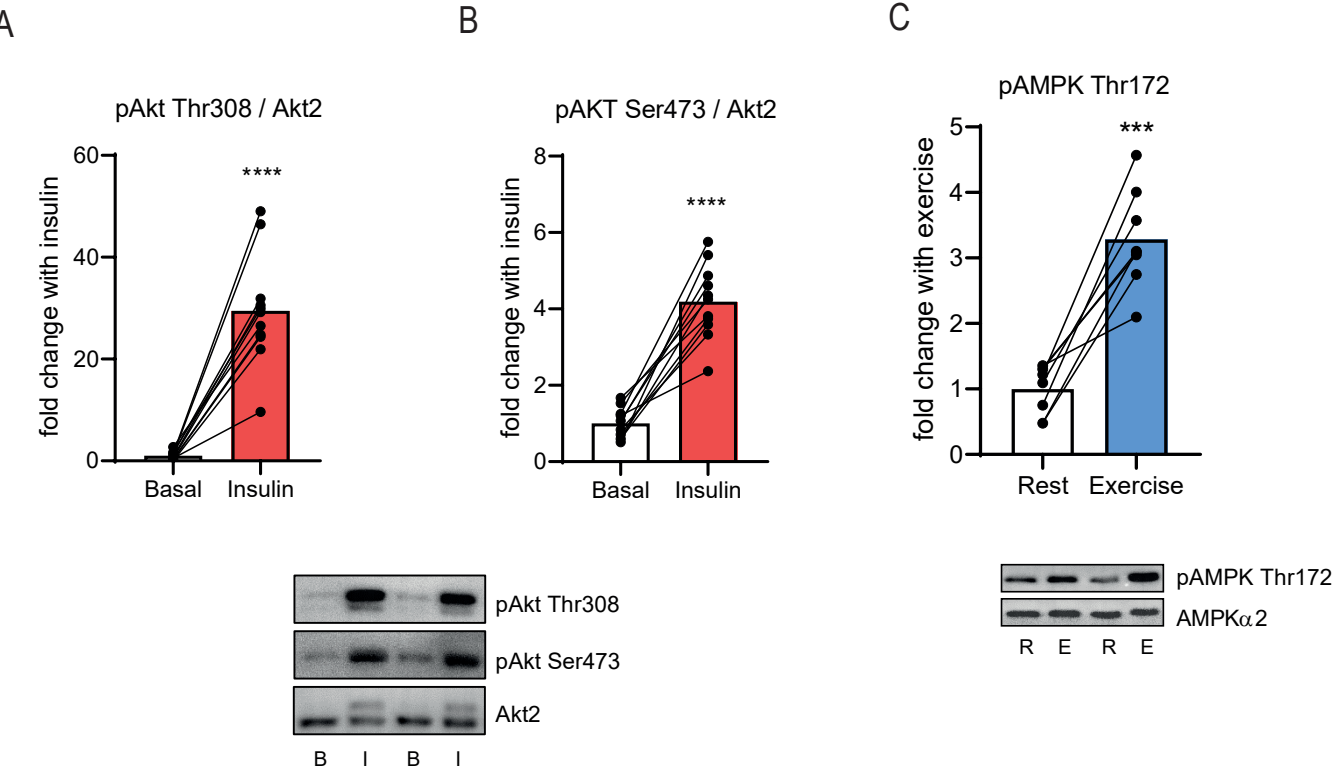

**Supplementary Figure S2 – Intact exercise-mediated decrease in phosphorylation of TBC1D4 in complex with TBC1D1.** IP of TBC1D1 from basal and insulin-stimulated human skeletal muscle followed by western blot of TBC1D4 total (A), p-TBC1D4 Thr642 (B) and p-TBC1D4 Ser318 (C). Western blot data on input protein lysate from same samples are included in each graph. Representative western blot for TBC1D1 IP's are shown in (D). Data were analyzed by paired Student t test. \*\*\*\*P<0.0001, \*\*\*P>0.001, and \*P>0.05. Bars are means and lines indicate individual responses (n=8).

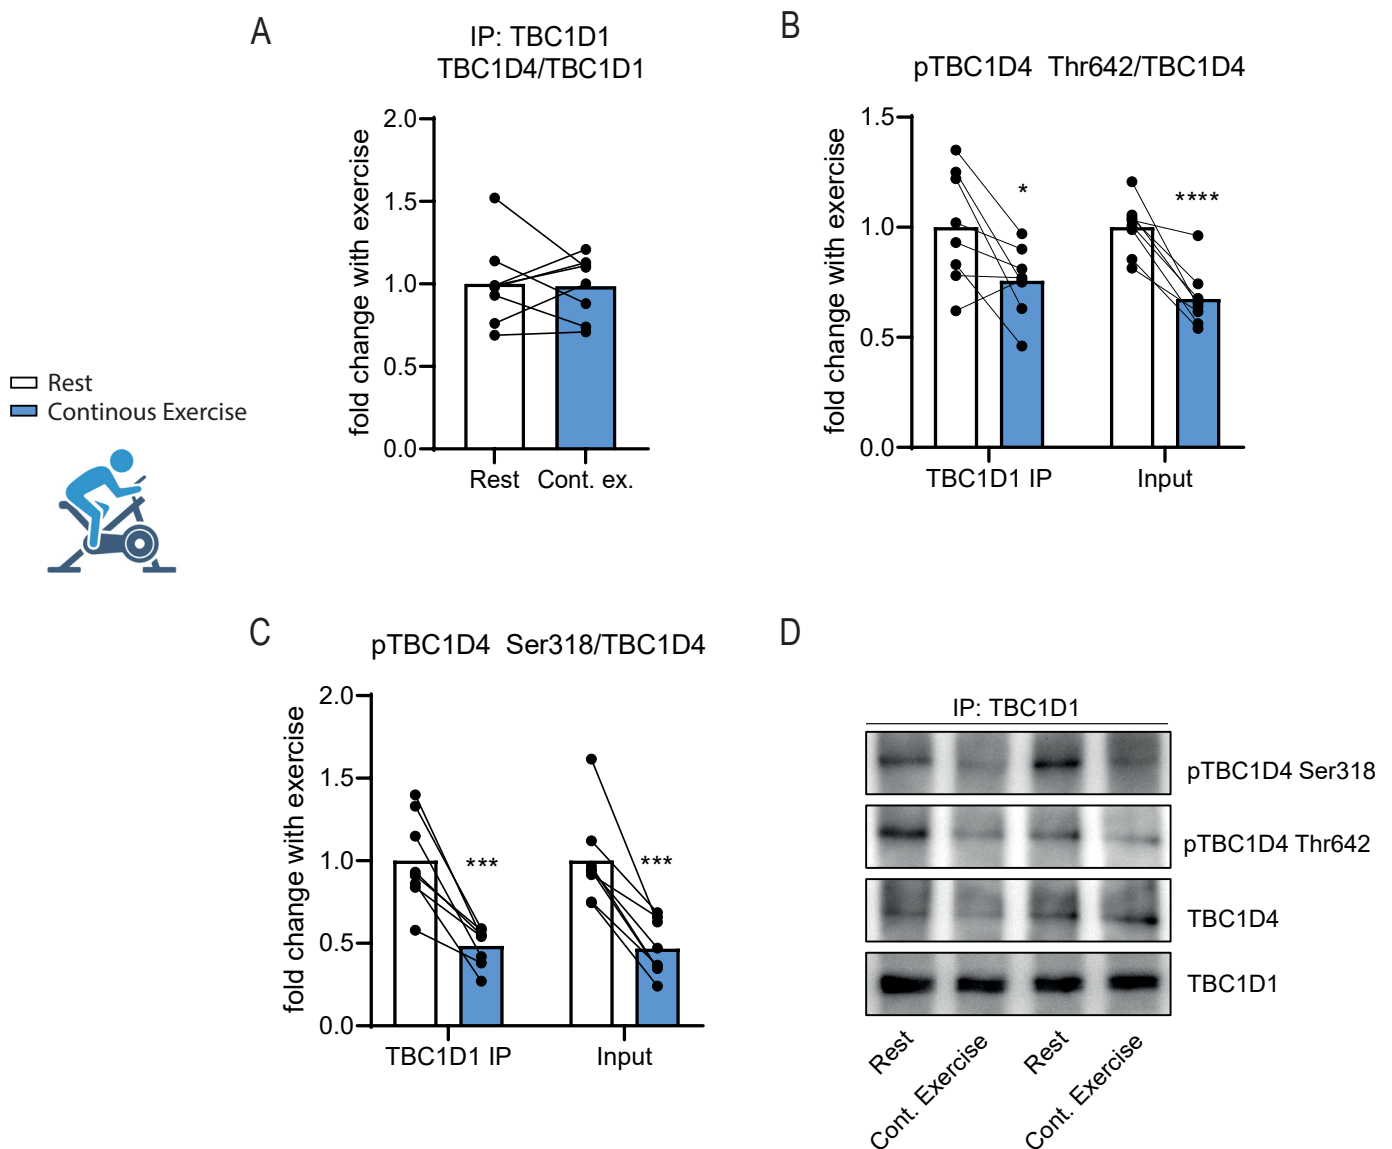

**Supplementary Figure S3 - Insulin-stimulated phosphorylation of the TBC1D1-TBC1D4 complex after exercise.** Western blot on protein lysate from rested, prior exercised human skeletal muscle at basal and in response to insulin stimulation followed by western blot of p-TBC1D4 Ser318 (A), p-TBC1D4 Thr642 (B) and p-TBC1D4 Ser704 (C). Representative western blot is shown in (D). Data were analyzed by repeated measures ANOVA. ANOVA significance is displayed with text on each graph. Where interaction was found between prior exercise and insulin Tukey's multiple comparisons test was used as post hoc test. \*\*\*P<0.0001 and \*\*P>0.01 indicate effect of insulin where †P>0.05 indicates effect of prior exercise. Bars are mean. Values for each individual is marked with a unique asterisk and connected with lines within each leg (n=7).

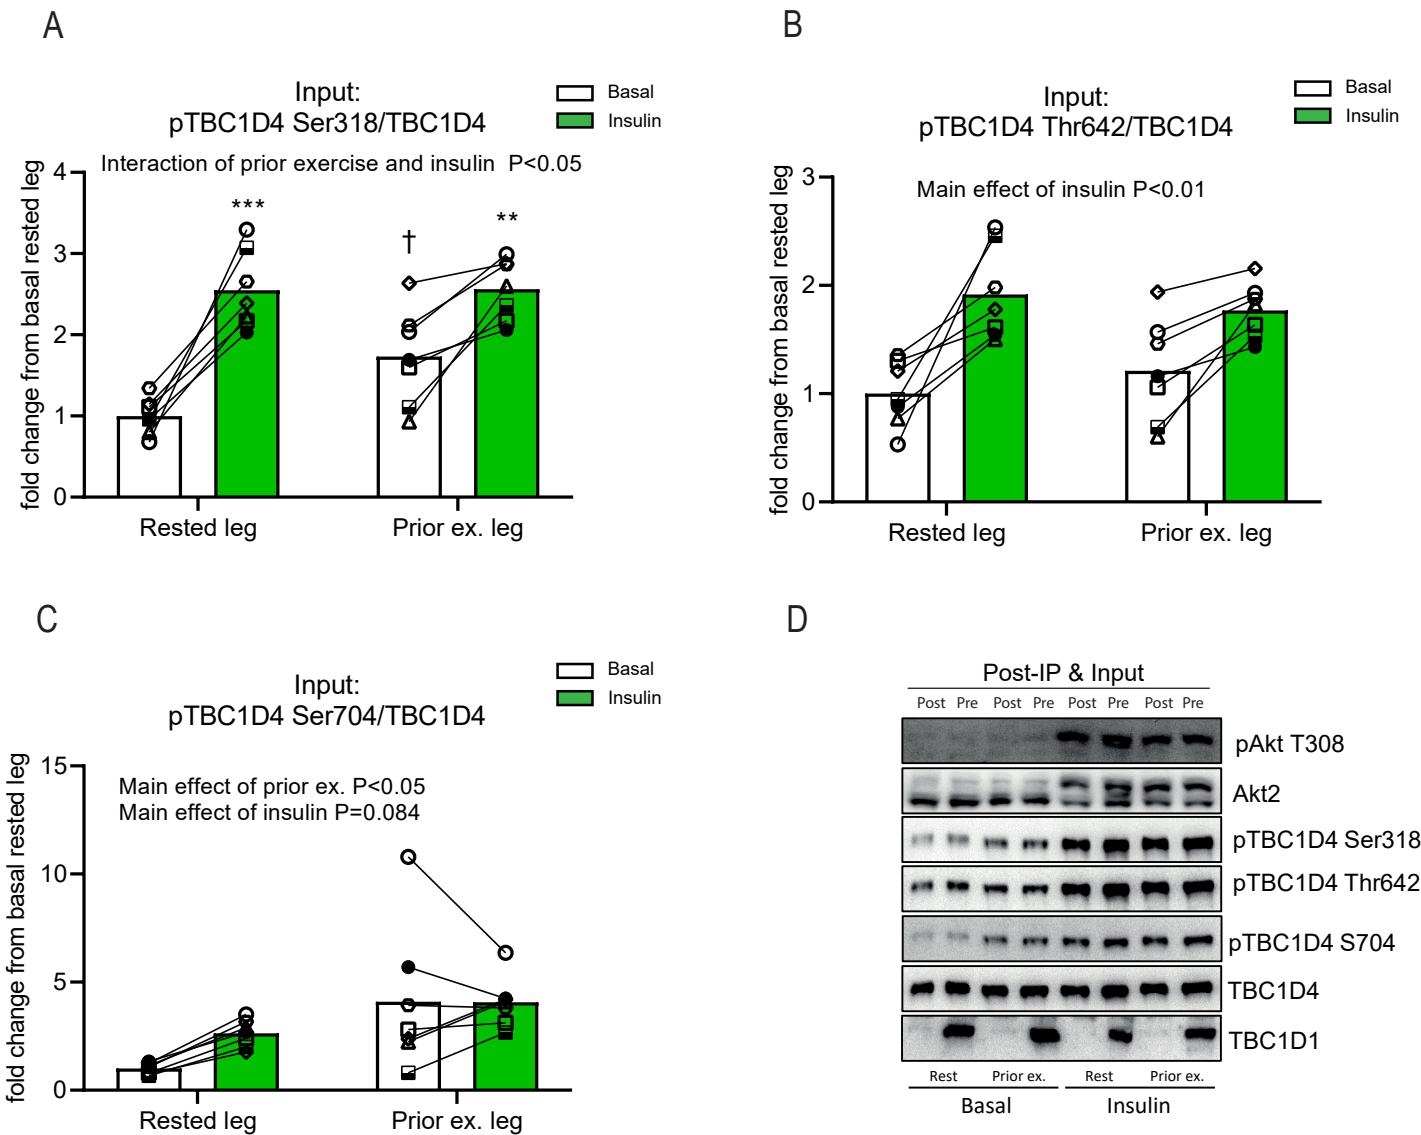

**Supplementary Figure S4 - Insulin-stimulated regulation of the TBC1D1-TBC1D4 complex in skeletal muscle from healthy and obese individuals with type 2 diabetic.** Western blot on protein lysate from basal and insulin-stimulated human skeletal muscle in healthy lean and obese individuals with type 2 diabetes of p-Akt Thr308 (A), p-Akt Ser473 (B), p-TBC1D4 Ser318 (C) and p-TBC1D4 Thr642 (D). Representative western blot of post-IP and Input lysate (E). Data were analyzed by two-way repeated measures ANOVA within group or if missing values a mixed effects model. A statistical significant interaction is displayed with text on each graph. Sidak's multiple comparisons test was used as post hoc test. \*\*\*\* $P < 0.0001$ , \*\*\* $P > 0.001$  and \*\* $P > 0.001$ . Bars are means and lines represent individual responses (n=9-10).

A

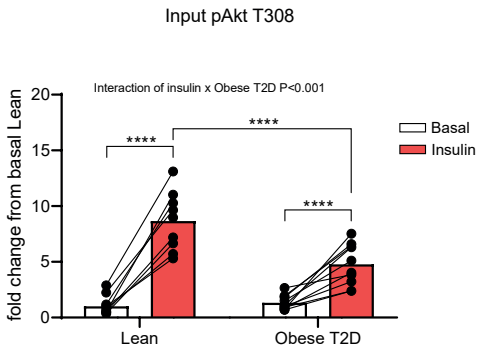

B

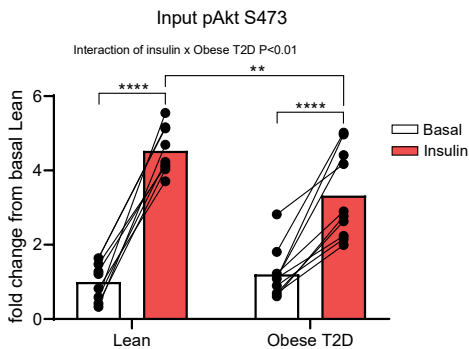

C

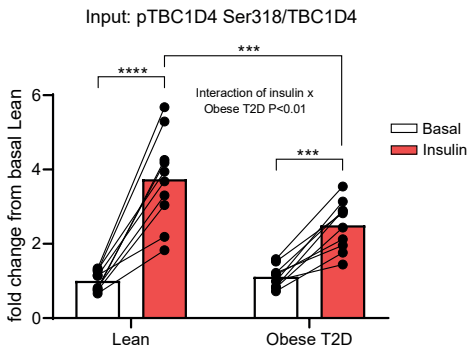

D

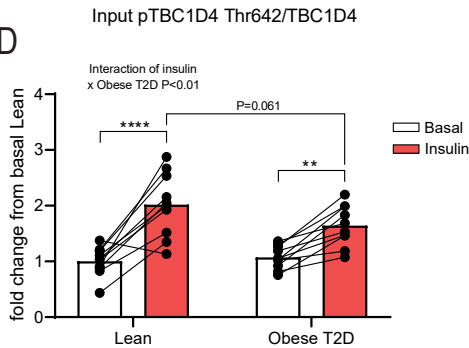

E

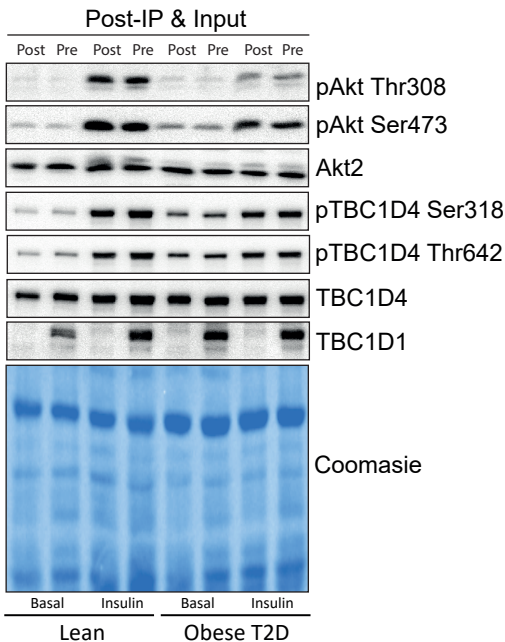

Supplement: Supplementary file 1 [file 1]
